# Supplementary material for: Interleukin-10 control of pre-miR155 maturation involves CELF2
Source: PubMed Central journal article supplement (PMC7179890; doi:10.1371/journal.pone.0231639), 2020-04-23

“x” indicates lanes which were not included in the figure

Figure 1 A

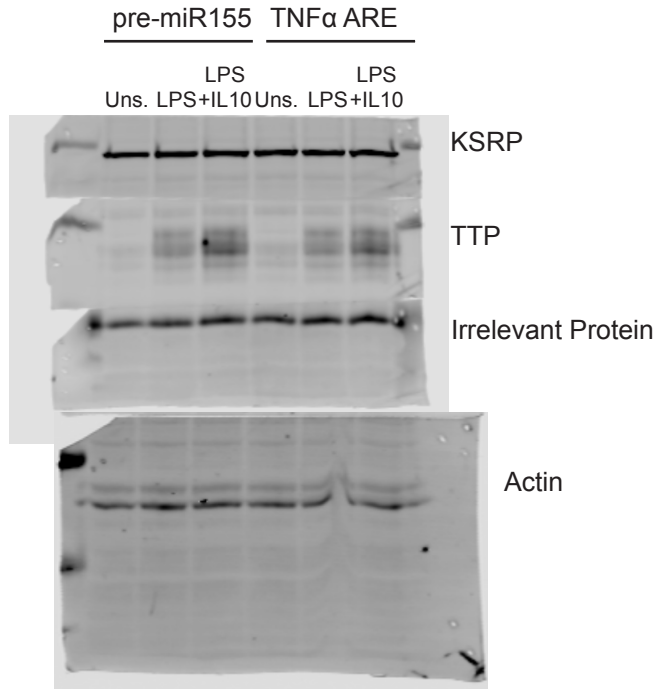

Figure 1 B

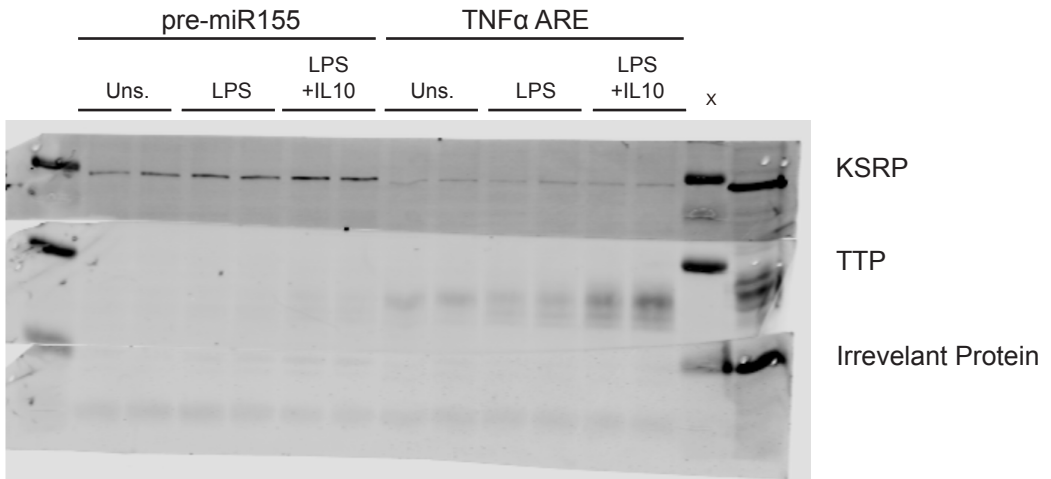

"x" indicates lanes which were not included in the figure

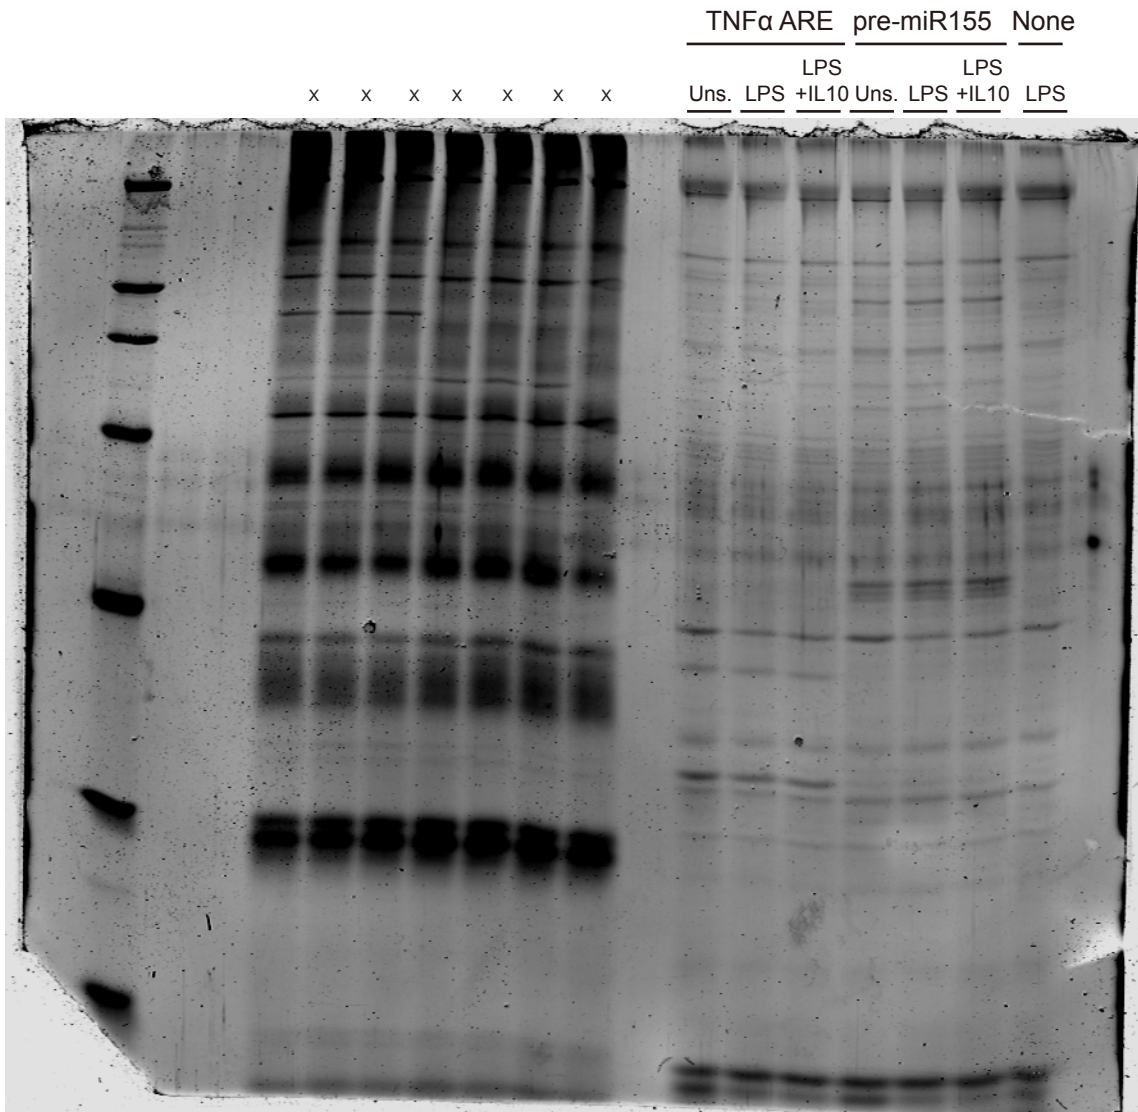

Figure 2

“x” indicates lanes which were not included in the figure

Figure 3A

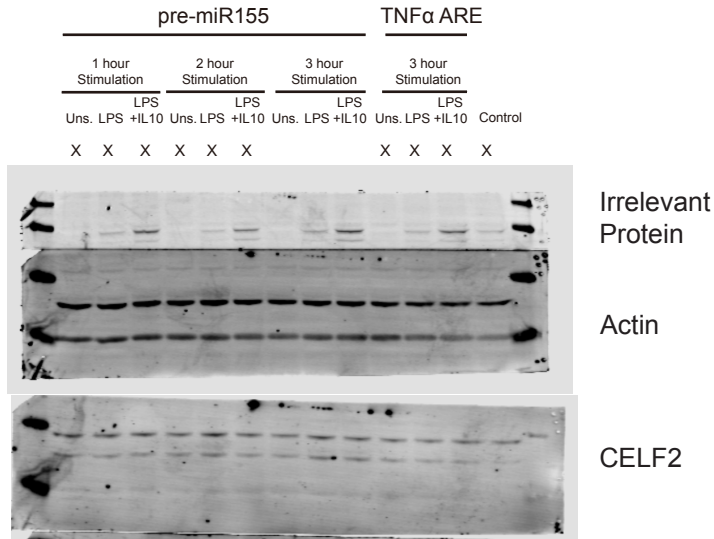

Figure 3B

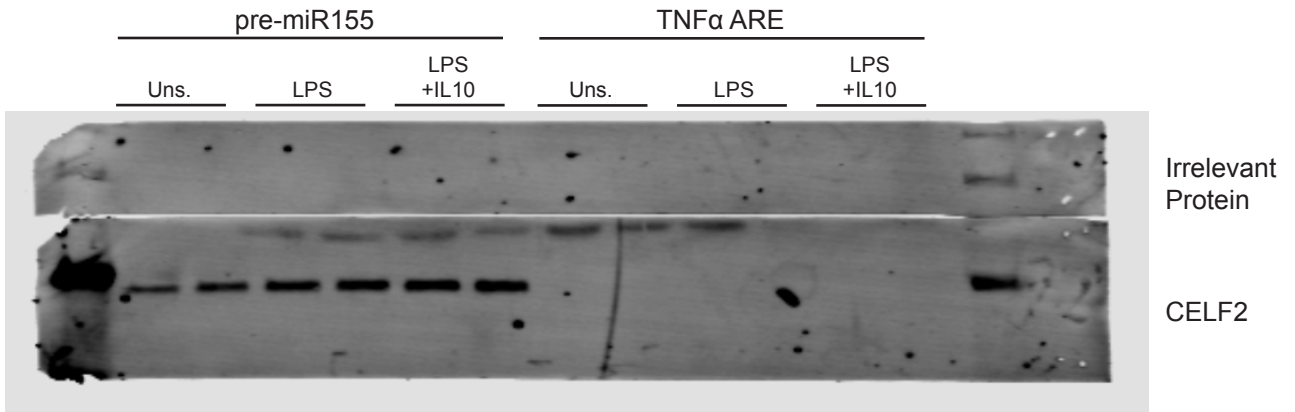

Supplement: pone.0231639.s002.pdf [file pone.0231639.s002.pdf]
